# Supplementary material for: Associations between Animal Welfare Indicators and Animal-Related Factors of Slaughter Cattle in Austria
Source: MDPI journal article supplement (doi:10.3390/ani12050659), 2022-03-05
Supplement: s1 [file s1]

## Supplementary Material

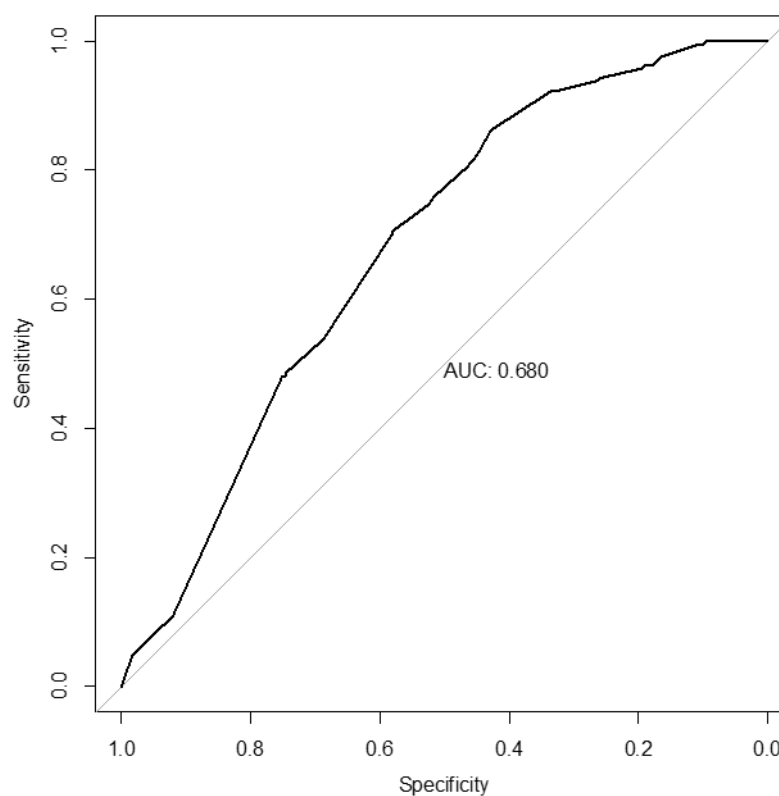

**Figure S1.** Receiver Operating Characteristics (ROC) graph of the final mixed binomial logistic model.

|                     | Cross Validation | Confusion Matrix |
|---------------------|------------------|------------------|
| Accuracy            | 64.4%            | 68.0%            |
| Sensitivity         | 51.9%            | 56.0%            |
| Specificity         | 75.7%            | 79.5%            |
| Positive prediction | 65.8%            | 71.1%            |
| Negative prediciton | 63.6%            | 66.8%            |

AUC= Area under the curve.

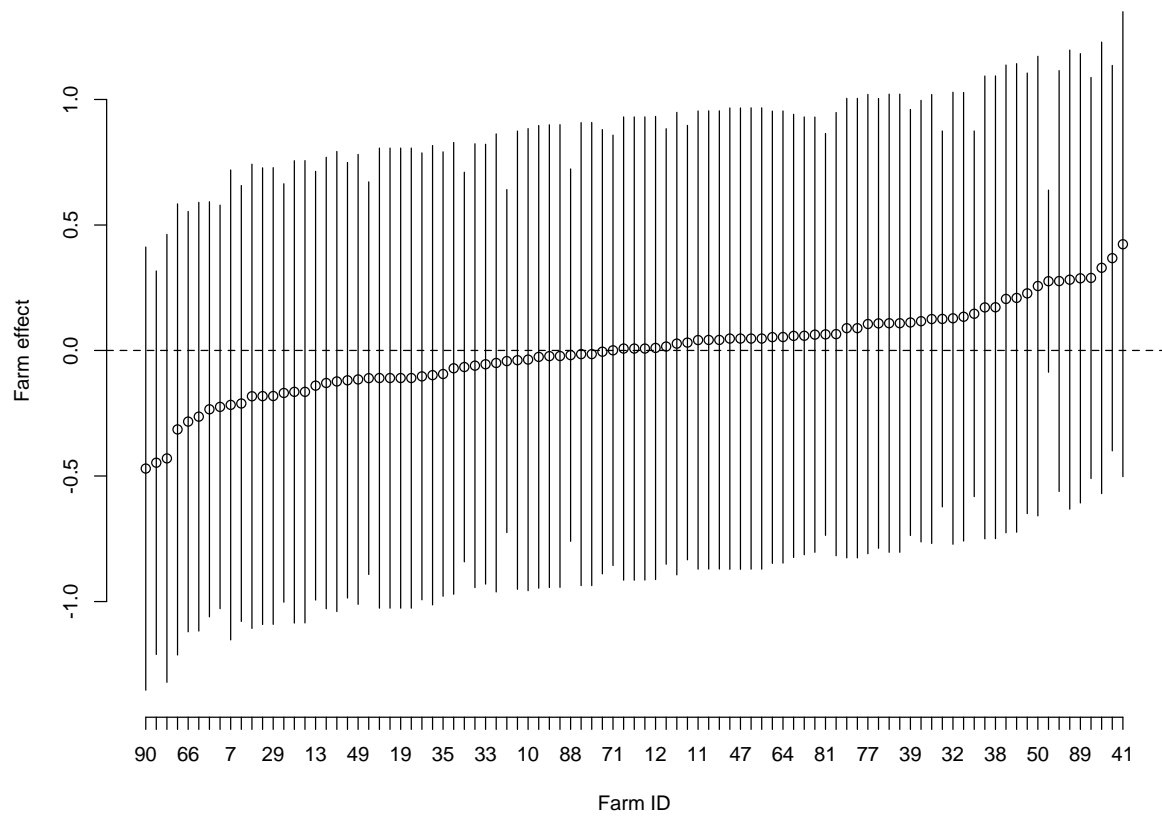

**Figure S2.** Estimated random intercepts and 95% prediction intervals for random effect farm based on the cumulative link mixed model.

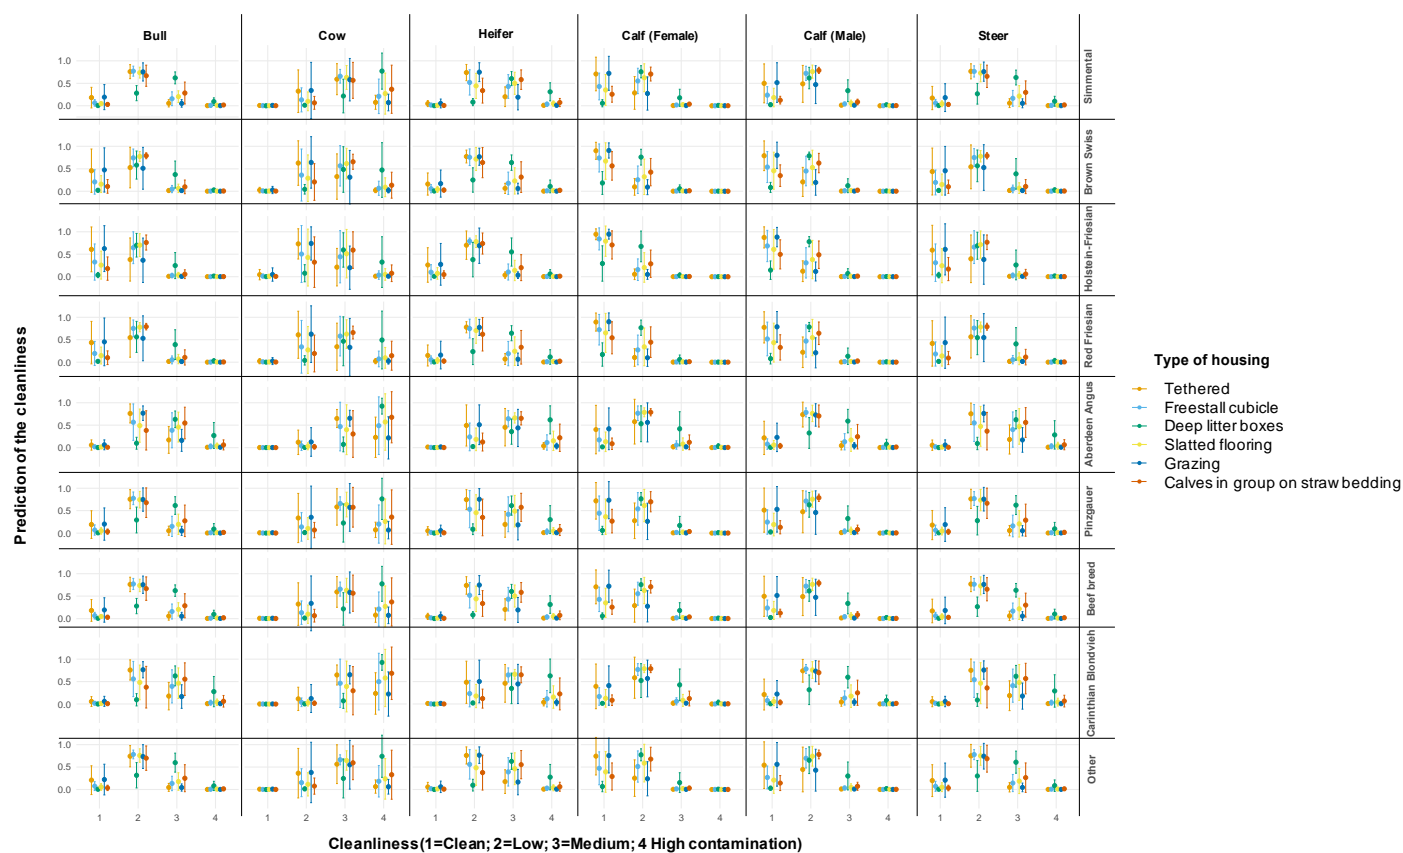

**Figure S3.** The expected probability (range: 0-1) for a cleanliness level depending on type of housing stratified by sex and breed of the slaughtered cattle.
